# Supplementary material for: Sensorimotor Recalibration Depends on Attribution of Sensory Prediction Errors to Internal Causes
Source: PubMed Central journal article supplement (PMC3554678; doi:10.1371/journal.pone.0054925), 2013-01-24
Supplement: pone.0054925.s004.pdf [file pone.0054925.s004.pdf]

**Table S1. Trial-by-trial recalibration of internal sensory predictions.**

| <b>subject</b> | <b>df</b> | <b>r</b> | <b>P</b> | <b>m</b> |
|----------------|-----------|----------|----------|----------|
| 1              | 166       | 0.176    | 0.022    | 0.134    |
| 2              | 176       | 0.331    | < 0.001  | 0.303    |
| 3              | 106       | 0.065    | 0.505    | 0.056    |
| 4              | 158       | 0.211    | 0.008    | 0.228    |
| 5              | 177       | 0.175    | 0.019    | 0.152    |
| 6              | 134       | 0.292    | < 0.001  | 0.165    |
| 7              | 174       | 0.221    | 0.003    | 0.184    |
| 8              | 173       | 0.236    | 0.002    | 0.216    |
| 9              | 169       | 0.538    | < 0.001  | 0.508    |
| 10             | 167       | 0.374    | < 0.001  | 0.330    |
| 11             | 176       | 0.151    | 0.045    | 0.133    |
